# Supplementary material for: Imaging biomarkers for clinical applications in neuro-oncology: current status and future perspectives
Source: Springer Nature journal article supplement (doi:10.1186/s40364-023-00476-7), 2023-03-29
Supplement: 40364_2023_476_MOESM1_ESM.pdf [file 40364_2023_476_MOESM1_ESM.pdf]

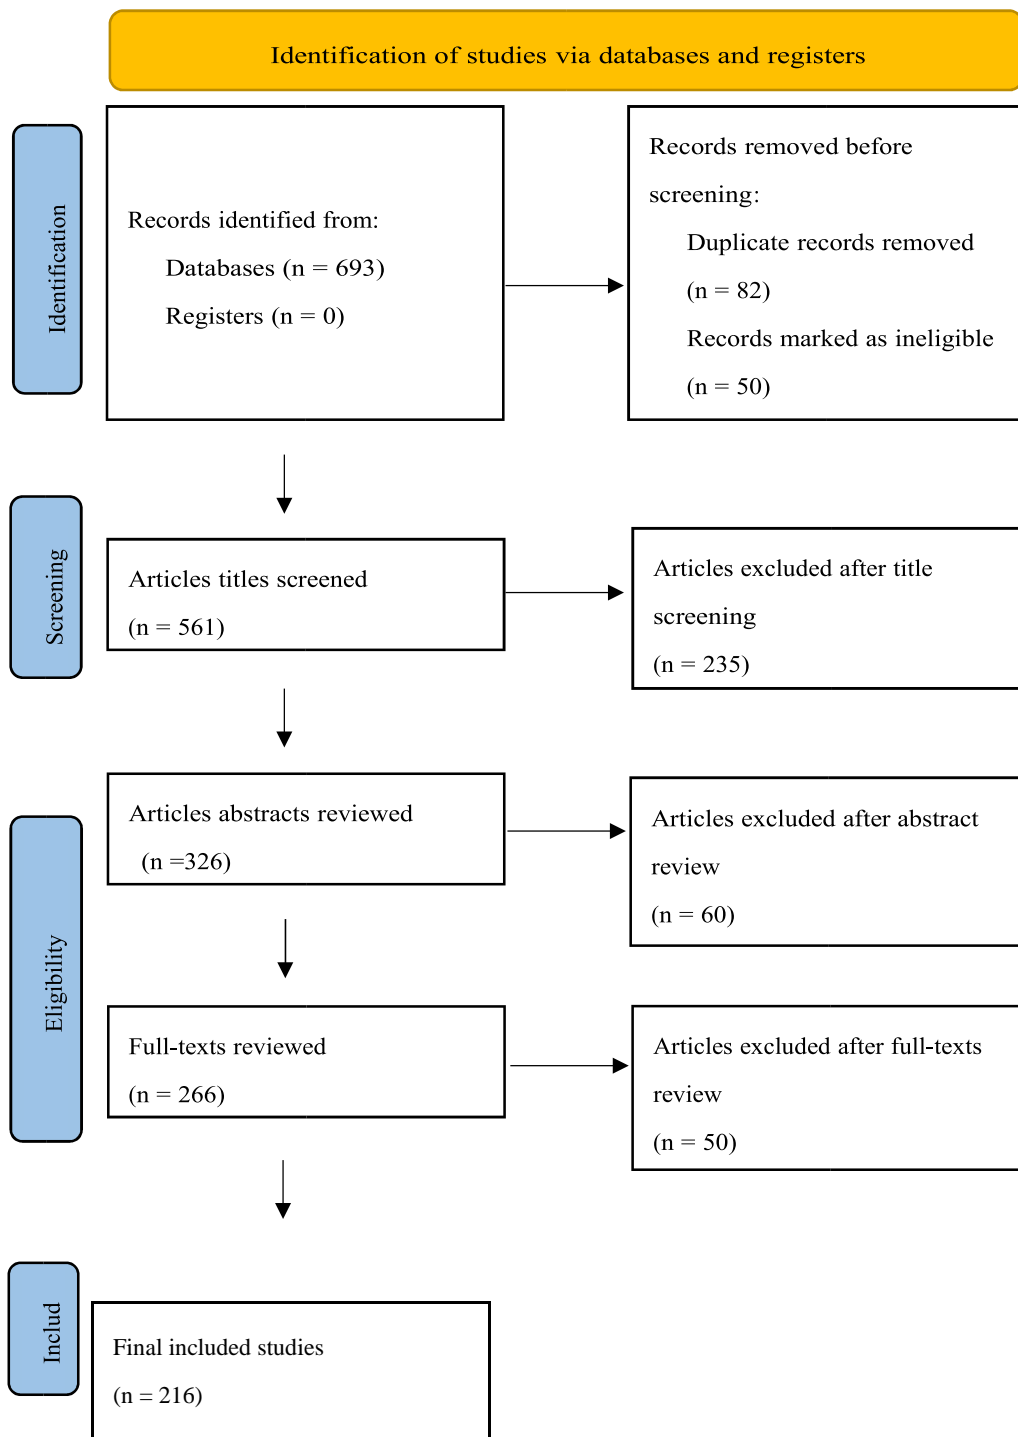

Fig. S1 PRISMA flowchart of the study selection process. The literature was conducted in accordance with the preferred reporting items for systematic reviews and meta-analysis (PRISMA) statement
